# Supplementary material for: Increased intracellular activity of MP1102 and NZ2114 against Staphylococcus aureus in vitro and in vivo
Source: PubMed Central journal article supplement (PMC5844868; doi:10.1038/s41598-018-22245-5), 2018-03-09
Supplement: 41598_2018_22245_MOESM1_ESM.pdf [file 41598_2018_22245_MOESM1_ESM.pdf]

1 **Increased intracellular action of MP1102 and NZ2114 against *Staphylococcus aureus* in vitro and**  
2 ***in vivo***

3 **Xiao Wang<sup>1,2\*</sup>, Xiumin Wang<sup>1,2\*\*</sup>, Da Teng<sup>1,2\*</sup>, Ruoyu Mao<sup>1,2</sup>, Ya Hao<sup>1,2</sup>, Na Yang<sup>1,2</sup>, Zhanzhan Li<sup>1,2</sup>,**  
4 **Jianhua Wang<sup>1,2\*\*</sup>**

5 **<sup>1</sup> Key Laboratory of Feed Biotechnology, Ministry of Agriculture, Beijing 100081, P. R. China. <sup>2</sup>**  
6 **Gene Engineering Laboratory, Feed Research Institute, Chinese Academy of Agricultural Sciences,**  
7 **Beijing 100081, P. R. China. \* Equal contributors into this paper. \*\* Correspondence and requests**  
8 **for materials should be addressed to X.M.W. (email: wangxiumin@caas.cn) and J.H.W. (email:**  
9 **wangjianhua@caas.cn)**

10

## 11 **SUPPORTING INFORMATION**

### 12 **Supplementary 1: Materials and Methods**

13 **Antimicrobial susceptibility testing of *S. aureus*.** Antimicrobial susceptibility testing of *S. aureus*  
14 (ATCC43300 and CVCC546) was performed by Kirby Bauer disc diffusion method according to the  
15 standards procedures recommended by Clinical Laboratory Standards Institute (CLSI 2012)<sup>1,2</sup>. The used  
16 22 antibiotics included: 1) aminoglycosides (amikacin, neomycin, gentamicin, kanamycin, and  
17 streptomycin), 2) quinolones (ciprofloxacin, norfloxacin), 3) sulfonamides (sulfisoxazole), 4)  
18 tetracyclines (tetracycline), 5) polypeptides (bacitracin and polymyxin B), 6) penicillins (penicillin,  
19 amoxicillin, ampicillin, oxacillin), 7) lincosamides (lincomycin), 8) macrolides (erythromycin and  
20 azithromycin), 9) amphenicols (chloramphenicol), 10) glycopeptides (vancomycin), and 11)  
21 cephalosporins (cefazolin and cefotaxime) (Qianshun Bio-tech, Beijing).

22 **SCC*mec* and *spa* typing of *S. aureus*.** For rapid DNA extraction, one to five bacterial colonies were

23 suspended in 50 µl of sterile distilled water and heated at 100°C for 10 min. Then the solution was frozen  
24 in -80°C for 30 min and heated at 100°C for 10 min. After centrifugation at 5000 rpm/min for 2 min. A  
25 total of 2 µl of the supernatant was used as a template in a 50-µl PCR. The SCC*mec* and x region of the  
26 *spa* gene was amplified by PCR with primers in Supplementary Table 1<sup>3-5</sup>. The x region of the *spa* genes  
27 was sequenced by Sangon Biotech (Shanghai, China) and the types were determined with the database  
28 accessible via <http://spa.ridom.de/spatypes.shtml>.

29 **Growth curves of *S. aureus*.** The *S. aureus* ATCC25923, ATCC43300 and CVCC546 strains were  
30 used to evaluate growth rate in Mueller – Hinton broth (MHB)<sup>6</sup>. Briefly, overnight cultures in MHB was  
31 inoculated into 50 ml of fresh MHB (with the inoculum size of 1% (v/v))<sup>7</sup>. All flasks were incubated at  
32 37°C for 15 h with shaking (250 rpm). Aliquots (2 ml) were taken out per hour to determine the culture  
33 turbidity at 600 nm in a TU-1810 ultraviolet visible spectrophotometer. It was performed for three times.

34 **FITC-labeled peptides.** The FITC-labeled peptides were carried out in ChinaPeptides Co., Ltd.  
35 (Shanghai, China) as previously described<sup>8</sup>. The peptides (MP1102 or NZ2114) were dissolved in 0.2 M  
36 PBS (pH 8.4) containing 1.1 equivalent of FITC. The mixture was stirred at room temperature for 12 h  
37 to complete the reaction. The reaction product was then dialyzed in dialysis tubing MD18 (with a  
38 molecular weight cut-off 2.0 kDa) at 4°C for 48 h with an exchange of ddH<sub>2</sub>O per 12 h to remove free  
39 FITC. The fluorescence intensity of FITC in dialyzed ddH<sub>2</sub>O was monitored to assure the complete  
40 removal of free FITC. Finally, the product was lyophilized in a freezer dryer for 36 h. The procedure was  
41 kept away from light.

#### 42 **References:**

43 [1] Kahsay, A., Mihret, A., Abebe, T., Andualem, T. Isolation and antimicrobial susceptibility pattern of  
44 *Staphylococcus aureus* in patients with surgical site infection at Debre Markos Referral Hospital, Amhara

- 45 Region, Ethiopia. *Arch Public Health* **72**, 16 (2014).
- 46 [2] Wikler, M. A., *et al.* Performance standards for antimicrobial sensitivity testing: seventeenth  
47 informational supplement. CLSI. **26**, 1–177 (2007).
- 48 [3] Zhang, K., McClure, J. A., Elsayed, S., Louie, T., Conly, J. M. Novel multiplex PCR assay for  
49 characterization and concomitant subtyping of staphylococcal cassette chromosome *mec* types I to V in  
50 methicillin-resistant *Staphylococcus aureus*. *J Clin Microbiol* **43**, 5026–5033 (2005).
- 51 [4] Rong, D., Wu, Q., Xu, M., Zhang, J., Yu, S. Prevalence, virulence genes, antimicrobial susceptibility,  
52 and genetic diversity of *Staphylococcus aureus* from retail aquatic products in China. *Front Microbiol* **8**,  
53 714 (2017).
- 54 [5] Strommenger, B., *et al.* *spa* Typing of *Staphylococcus aureus* as a frontline tool in epidemiological  
55 typing. *J Clin Microbiol* **46**, 574–81 (2008).
- 56 [6] Diarra, M. S., Petitclerc, D., Lacasse, P. Response of *Staphylococcus aureus* isolates from bovine  
57 mastitis to exogenous iron sources. *J Dairy Sci* **85**, 2141–2148 (2002).
- 58 [7] Buchanan, R. L., *et al.* Response surface models for the effects of temperature, pH, sodium chloride,  
59 and sodium nitrite on the aerobic and anaerobic growth of *Staphylococcus aureus* 196e1. *J Food Safety*  
60 **13**:159–175 (1993).
- 61 [8] Sun, X. X., *et al.* Fluorescence characterization of the thermal stability of collagen mimic peptides.  
62 *Chinese Chem Lett* **28**, 963–967 (2017).

63

64 **Supplementary 2: Tables**

65

66

**Table 1** Primers used in SCC*mec* and *spa* typing of *S. aureus*

| Name                      | Primer (5'→3')           | Amplicon size (bp) | Reference |
|---------------------------|--------------------------|--------------------|-----------|
| <b>SCC<i>mec</i> type</b> |                          |                    |           |
| SCC <i>mec</i> I-F        | GCTTTAAAGAGTGTCGTTACAGG  | 613                | 3, 4      |
| SCC <i>mec</i> I -R       | GTTCTCTCATAGTATGACGTCC   |                    |           |
| SCC <i>mec</i> II -F      | CGTTGAAGATGATGAAGCG      | 398                |           |
| SCC <i>mec</i> II -R      | CGAAATCAATGGTTAATGGACC   |                    |           |
| SCC <i>mec</i> III-F      | CCATATTGTGTACGATGCG      | 280                |           |
| SCC <i>mec</i> III-R      | CCTTAGTTGTCGTAACAGATCG   |                    |           |
| SCC <i>mec</i> IVa-F      | GCCTTATTCGAAGAAACCG      | 776                |           |
| SCC <i>mec</i> IVa-R      | CTACTCTTCTGAAAAGCGTCG    |                    |           |
| SCC <i>mec</i> IVb-F      | TCTGGAATTACTTCAGCTGC     | 493                |           |
| SCC <i>mec</i> IVb-R      | AAACAATATTGCTCTCCCTC     |                    |           |
| SCC <i>mec</i> IVc-F      | ACAATATTTGTATTATCGGAGAGC | 200                |           |
| SCC <i>mec</i> IVc-R      | TTGGTATGAGGTATTGCTGG     |                    |           |
| SCC <i>mec</i> IVd-F      | CTCAAATACGGACCCCAATACA   | 881                |           |
| SCC <i>mec</i> IVd-R      | TGCTCCAGTAATTGCTAAAG     |                    |           |
| SCC <i>mec</i> V -F       | GAACATTGTTACTTAAATGAGCG  | 325                |           |
| SCC <i>mec</i> V -R       | TGAAAGTTGTACCCTTGACACC   |                    |           |
| <b><i>mecA</i> gene</b>   |                          |                    |           |
| <i>mecA</i> -F            | GTGAAGATATACCAAGTGATT    | 147                | 3         |
| <i>mecA</i> -R            | ATGCGCTATAGATTGAAAGGAT   |                    |           |
| <i>mecI</i> -F            | CCCTTTTTATACAATCTCGTT    | 146                |           |
| <i>mecI</i> -R            | ATATCATCTGCAGAATGGG      |                    |           |
| <b><i>Spa</i> type</b>    |                          |                    |           |
| <i>Spa</i> -x-F           | TAAAGACGATCCTTCGGTGAGC   | -                  | 5         |
| <i>Spa</i> -x-R           | CAGCAGTAGTGCCGTTTGCTT    |                    |           |

67

68 -: no data. The primers were synthesized by Sangon Biotech (Shanghai, China).

69

70

**Table 2** Antimicrobial susceptibility patterns of *S. aureus* ATCC43300 and CVCC546

71

| <b>Antibiotics</b> | <b><i>S. aureus</i> ATCC43300</b> | <b><i>S. aureus</i> CVCC546</b> |
|--------------------|-----------------------------------|---------------------------------|
| Vancomycin         | S                                 | S                               |
| Lincomycin         | R                                 | I                               |
| Amoxicillin        | R                                 | S                               |
| Ciprofloxacin      | S                                 | S                               |
| Amikacin           | R                                 | S                               |
| Ampicillin         | R                                 | S                               |
| Oxacillin          | R                                 | S                               |
| Erythromycin       | R                                 | I                               |
| Tetracycline       | I                                 | R                               |
| Bacitracin         | I                                 | R                               |
| Norfloxacin        | S                                 | S                               |
| Polymyxin B        | R                                 | R                               |
| Sulfisoxazole      | R                                 | R                               |
| Neomycin           | R                                 | I                               |
| Azithromycin       | R                                 | S                               |
| Kanamycin          | R                                 | I                               |
| Streptomycin       | I                                 | S                               |
| Cefotaxime         | I                                 | I                               |
| Gentamicin         | R                                 | S                               |
| Chloramphenicol    | S                                 | S                               |
| Cefazolin          | S                                 | S                               |
| Penicillin         | R                                 | I                               |

87

R: resistant; I: Intermediate; S: susceptible.

88

89

**Table 3** Sources, types and susceptibilities of different *S. aureus* strains

90

| <i>S. aureus</i>                  | Source                                 | SCCmec type | Spa type | Antibiotic resistance profile                                        | Biosafety level |
|-----------------------------------|----------------------------------------|-------------|----------|----------------------------------------------------------------------|-----------------|
| Methicillin-susceptible ATCC25923 | Clinical isolate                       | -           | -        | -                                                                    | II              |
| Methicillin-resistant ATCC43300   | Clinical isolate                       | II          | t007     | Methicillin, oxacillin <sup>a</sup>                                  | II              |
| Highly virulent CVCC546           | Isolation from a pig in Beijing, China | -           | t034     | Tetracycline, bacitracin, polymyxin B and sulfisoxazole <sup>b</sup> | III             |

91 -: negative. a: the ATCC website. b: in this study.

92

93 **Table 4** Effect of cathepsin B on the MICs of MP1102, NZ2114 against *S. aureus* resistant ATCC43300

94

|        | MIC ( $\mu\text{g/ml}$ ) |                            |
|--------|--------------------------|----------------------------|
|        | Buffer + AMP             | Buffer + cathepsin B + AMP |
| MP1102 | 0.25                     | 0.25                       |
| NZ2114 | 0.5                      | 0.5                        |

95

96

97

98

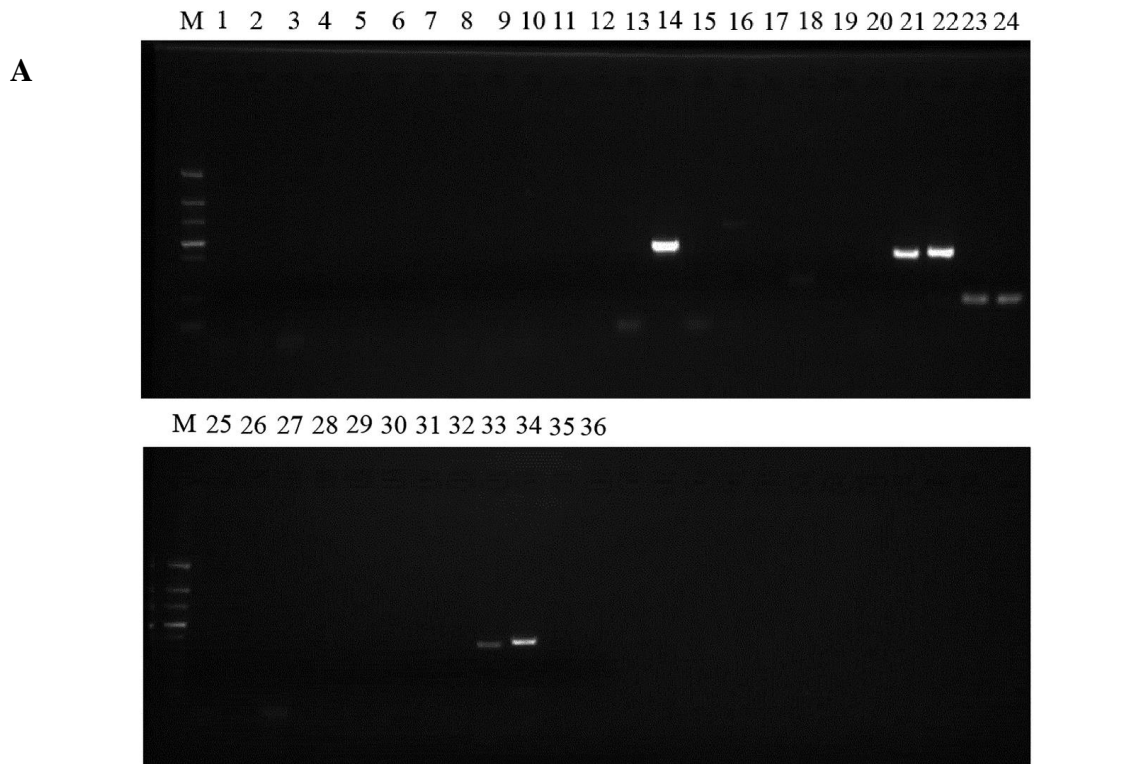

B

*S. aureus* ATCC43300

TAATTAAGACGATCCTTCGGTGAGCAAAGAAATTTAGCAGAAGCTAAAAAGCTAAA  
 CGATGCTCAAGCACAAAAGAGGAAGACAACAACAAGCCTGGCAAAGAAGACAACA  
 ACAAGCCTGGTAAAGAAGACGGCAACAAACCTGGTAAAGAAGACGGCAACAAACCT  
 GGTAAAGAAGACGGCAACAAACCTGGTAAAGAAGACGGCAACAAACCTGGTAAAGA  
 AGACAACAAAAACCTGGCAAAGAAGATGGCAACAAACCTGGTAAAGAAGACGGCA  
 ACAAGCCTGGTAAAGAAGACGGCAACGGAGTACATGTCGTAAACCTGGTGATACAGT  
 AAATGACATTGCAAAAGCAAACGGCACTACTGCTG  
 t007,15-12-16-16-16-16-02-25-17

*S. aureus* CVCC546

TAAAGACGATCCTTCGGTGAGCAAAGAAATTTAGCAGAAGCTAAAAAGCTAAACGAT  
 GCTCAAGCACAAAAGAGGAAGACAACAACAAGCCTGGTAAAGAAGACGGCAACAA  
 ACCTGGTAAAGAAGACAACAAAAACCTGGCAAAGAAGATGGCAACAAACCTGGTA  
 AAGAAGACAACAAAAACCTGGCAAAGAAGATGGCAACAAACCTGGTAAAGAAGAC  
 AACAAAAACCTGGTAAAGAAGATGGCAACAAGCCTGGTAAAGAAGATGGCAACAA  
 ACCTGGTAAAGAAGACGGCAACGGAAATACATGTCGTAAACCTGGTGATACAGTAAAT  
 GACATTGCAAAAGCAAACGGCACTACTGCTG  
 t034,08-16-02-25-02-25-34-24-25

100

101

Fig. S1

102

Figure 1 PCR assay identifies SCCmec and spa types and subtypes and simultaneously detects the



103 methicillin resistance (*mecA* gene). **(A)** Gel electrophoresis. M: DNA Marker II; 1-12: *S. aureus*  
104 ATCC25923; 13-24: *S. aureus* ATCC43300; 25-36: *S. aureus* CVCC546. 1, 13, 25: SCC*mec* I; 2, 14, 26:  
105 SCC*mec* II; 3, 15, 27: SCC*mec* III; 4, 16, 28: SCC*mec* IVe; 5, 17, 29: SCC*mec* IVe; 6, 18, 30:  
106 SCC*mec* IVc; 7, 19, 31: SCC*mec* IVe; 8, 20, 32: SCC*mec* V; 9, 21, 33: spa-x-1; 10, 22, 34: spa-x-2;  
107 11, 23, 35: *mecA*; 12, 24, 36: *mec* I. **(B)** The x region of the *spa* gene sequence.  
108

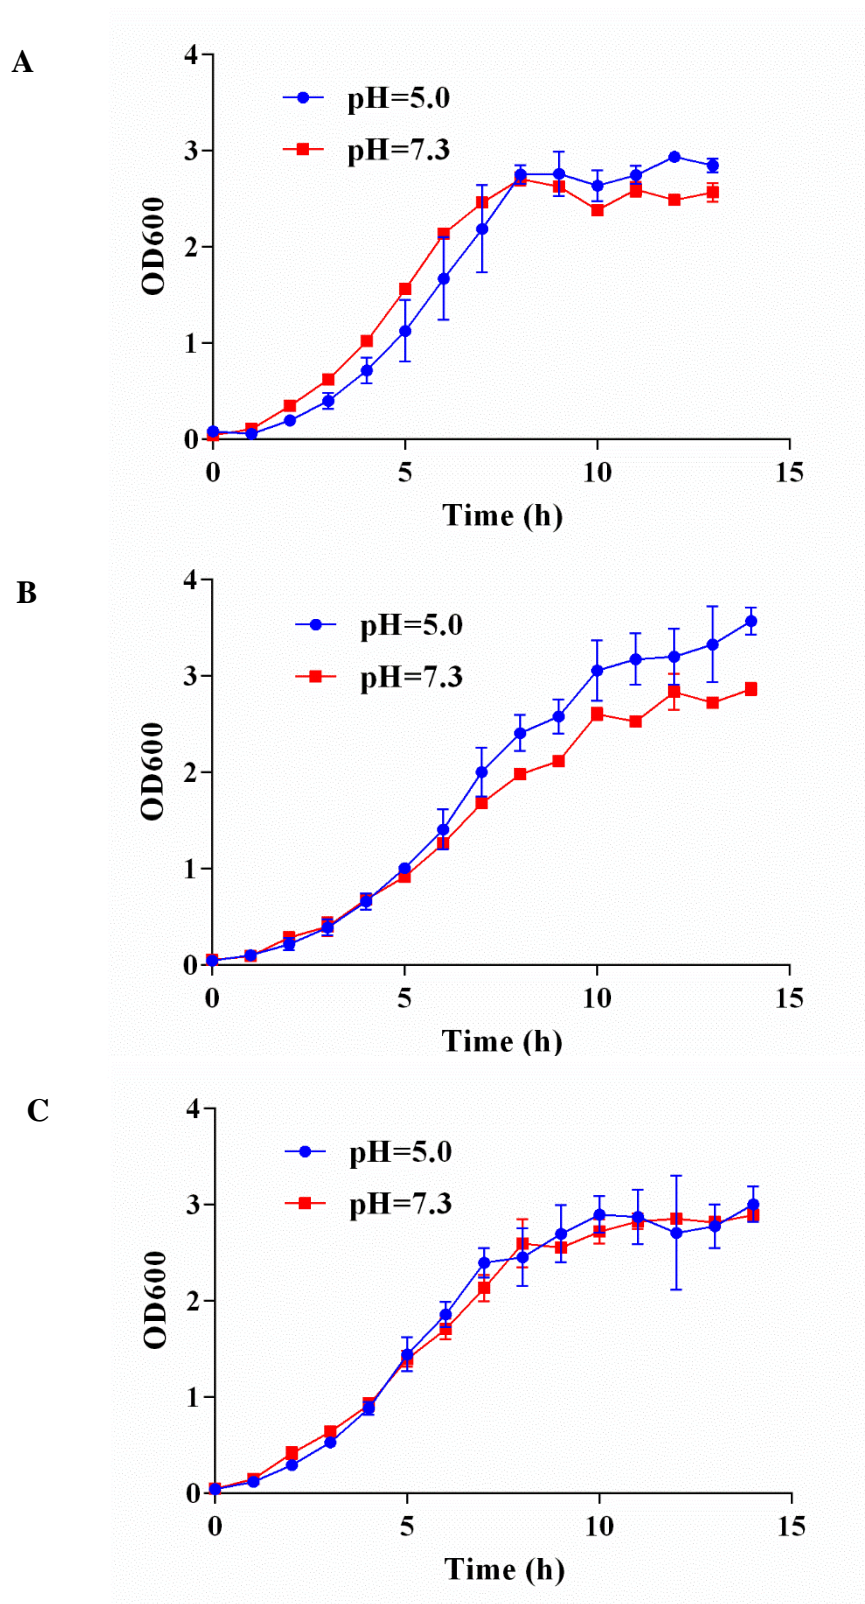

111 **Figure 2** Growth curves of *S. aureus* ATCC25923 (A), ATCC43300 (B) and CVCC546 (C) at pH 5.0

112 and pH 7.3.

113

114

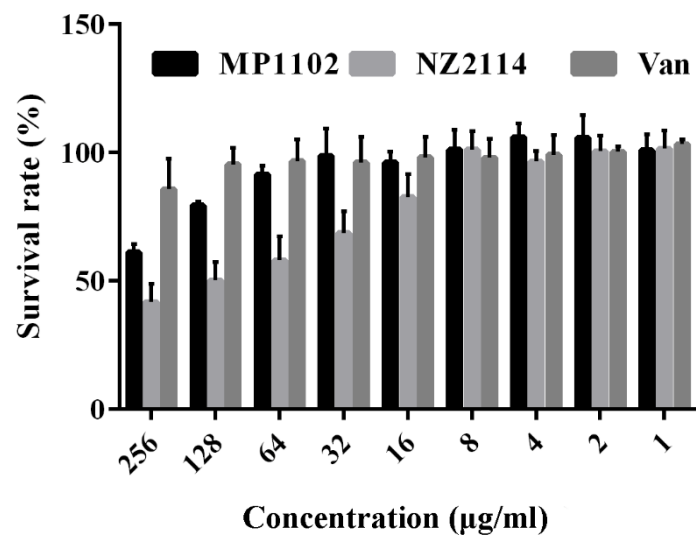

115

116

Fig. S3

117 **Figure 3** Viability of RAW 264.7 cells incubated with NZ2114 and MP1102 for 24 h. RAW 264.7 cells

118 were incubated with 1-256 µg/ml for 24 h and subsequently cell viability was determined using the MTT

119 assay. Results are means  $\pm$  S.D. for three experiments.

120

121

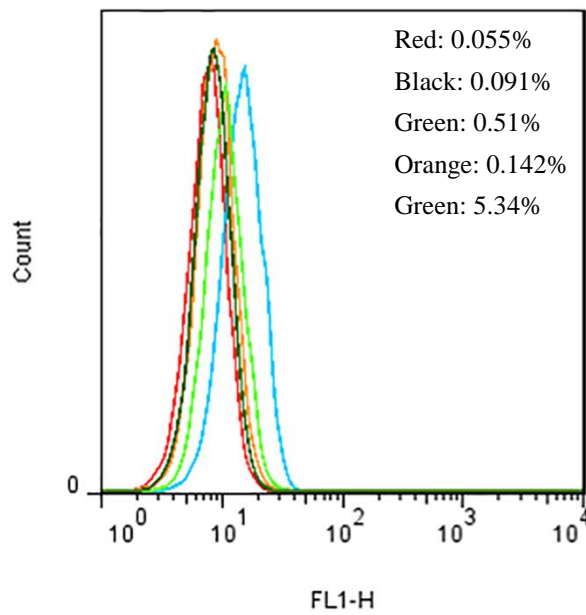

122

**Fig. S4**

123 **Figure 4** Effect of MP1102 and NZ2114 on the cell membrane of RAW 264.7 cells. Cells were incubated

124 with different concentrations of MP1102 and NZ2114 for 24 h prior to staining with 5  $\mu\text{g/ml}$  PI at 37°C

125 for 10 min. PI fluorescence in RAW 264.7 cells was measured by flow cytometry. Red line: control;

126 black line: 25  $\mu\text{g/ml}$  MP1102; green line: 250  $\mu\text{g/ml}$  MP1102; orange line: 25  $\mu\text{g/ml}$  NZ2114; green line:

127 250  $\mu\text{g/ml}$  NZ2114.

128
